# Supplementary material for: Mir‐30b‐5p Promotes Proliferation, Migration, and Invasion of Breast Cancer Cells via Targeting ASPP2
Source: Hindawi journal article supplement (doi:10.1155/2020/7907269), 2020-01-01
Supplement: f1 [file 7907269.f1.pdf]

Supplement Table I. Patient clinicalpathological characteristics (Summary).

| Characteristics             | Patient<br>Number | miR-30b-5p Expression level |       |               |       |      |       |
|-----------------------------|-------------------|-----------------------------|-------|---------------|-------|------|-------|
|                             |                   | Low                         |       | No difference |       | High |       |
|                             |                   | No.                         | %     | No.           | %     | No.  | %     |
| Age                         |                   |                             |       |               |       |      |       |
| ≤40                         | 1                 | 0                           | 0     | 0             | 0     | 1    | 100   |
| 40-60                       | 9                 | 1                           | 11.11 | 2             | 22.22 | 6    | 66.67 |
| >60                         | 4                 | 0                           | 0     | 0             | 0     | 4    | 100   |
| Clinical stage at diagnosis |                   |                             |       |               |       |      |       |
| I                           | 3                 | 1                           | 33.33 | 1             | 33.33 | 1    | 33.33 |
| II                          | 8                 | 0                           | 0     | 0             | 0     | 8    | 0     |
| III                         | 3                 | 0                           | 0     | 1             | 33.33 | 2    | 66.67 |
| Tumor stage (size cm)       |                   |                             |       |               |       |      |       |
| T1(≤2.0)                    | 5                 | 1                           | 20    | 1             | 20    | 3    | 60    |
| T2(>2.0 to ≤5.0)            | 7                 | 0                           | 0     | 1             | 14.29 | 6    | 85.71 |
| T3 (>5.0)                   | 2                 | 0                           | 0     | 0             | 0     | 2    | 100   |
| Tumor number                |                   |                             |       |               |       |      |       |
| Single                      | 10                | 1                           | 10    | 2             | 20    | 7    | 70    |
| Multiple                    | 4                 | 0                           | 0     | 0             | 0     | 4    | 100   |
| Nodal stage                 |                   |                             |       |               |       |      |       |
| N0 (node negative)          | 8                 | 1                           | 12.5  | 1             | 12.5  | 6    | 75    |
| N1 (1-3 positive nodes)     | 3                 | 0                           | 0     | 1             | 33.33 | 2    | 66.67 |
| N2 (4-9 positive nodes)     | 2                 | 0                           | 0     | 0             | 0     | 2    | 100   |
| N3 (≥ 10 positive nodes)    | 1                 | 0                           | 0     | 0             | 0     | 1    | 100   |
| Histological grade          |                   |                             |       |               |       |      |       |
| Grade 1                     | 2                 | 1                           | 50    | 0             | 0     | 1    | 50    |
| Grade 2                     | 5                 | 0                           | 0     | 1             | 20    | 4    | 80    |
| Grade 3                     | 7                 | 0                           | 0     | 1             | 14.29 | 6    | 85.71 |
| Subtypes of breast cancer   |                   |                             |       |               |       |      |       |
| Luminal A-like              | 2                 | 1                           | 50    | 0             | 0     | 1    | 50    |
| Luminal B-like              | 3                 | 0                           | 0     | 1             | 33.33 | 2    | 66.67 |
| HER2 positive               | 4                 | 0                           | 0     | 1             | 25    | 3    | 75    |
| Triple negative             | 5                 | 0                           | 0     | 0             | 0     | 5    | 100   |
| Not known                   | 0                 | 0                           | 0     | 0             | 0     | 0    | 0     |
